# Supplementary material for: Activation by cleavage of the epithelial Na+ channel α and γ subunits independently coevolved with the vertebrate terrestrial migration
Source: eLife. 2022 Jan 5;11:e75796. doi: 10.7554/eLife.75796 (PMC8791634; doi:10.7554/eLife.75796)
Supplement: Source data 1. [file elife-75796-supp2.xlsx]

## Sheet: Coevolution
Trait 1	Site 1	Terrestrial	Terrestrial	Terrestrial	Lungs	Lungs	Lungs	Terrestrial	Lungs
Trait 2	Site 2	Site 1	Site 2	both sites	Site 1	Site 2	both sites	PY	PY
Method	ML	ML	ML	ML	ML	ML	ML	ML	ML
Lh-Independent	-33.355	-37.7871	-30.7737	-33.8802	-47.7405	-40.727	-43.8336	-26.1518	-36.1052
Lh-Dependent	-28.7948	-32.5473	-29.4322	-29.2504	-44.2546	-40.6676	-39.8221	-25.5386	-34.8145
degrees of freedom	2	2	2	2	2	2	2	2	2
LR	9.12045	10.4795	2.68293	9.25963	6.9718	0.118942	8.02311	1.2264	2.58128
p value (chisq.dist.rt)	0.0104597	0.00530149	0.261463	0.00975658	0.0306262	0.942263	0.0181053	0.541616	0.275095
Ind. model parameters
alpha1	0.000342	0.000412	0.000412	0.000412	0.001102	0.001101	0.001102	0.000412	0.001102
beta1	0.000769	0	0	0	0	0	0	0	0
alpha2	0.000342	0.000497	0.00022	0.000294	0.000497	0.00022	0.000294	7e-06	7e-06
beta2	0.00076	0.001518	0.000469	0.001552	0.001518	0.000469	0.001552	0.000324	0.000324
Dep. Model parameters
q12 (trait1=0, trait2 = f)	0.000181	0.001541	0.000381	0.000938	0.001516	0.000222	0	0	0
q13 (trait2=0, trait1 = f)	0.000181	0.000403	0.000409	0.000404	0.00108	0.001093	0.00109	0.00041	0.001102
q21 (trait1=0, trait2 = r)	0.001997	0.006663	0.002414	0.006902	0.006931	0	2.52263	0.000461	0.000597
q24 (trait2=1, trait1 = f)	0.233317	0.000403	0.000409	0.000404	0.00108	0.001093	0.00109	0.00041	0.001102
q31 (trait2=0, trait1 = r)	0.001997	0	0	0	0	0	0	0	0
q34 (trait1=1, trait2 = f)	0.233317	0	0	0	0	0.000192	0.00162	0	0
q42 (trait2=1, trait1 = r)	0.035853	0	0	0	0	0	0	0	0
q43 (trait1=1, trait2 = r)	0.035853	0	0	0	0.000481	0.000522	0	0	0
Independent model arguments	Res alpha1 alpha2	Res beta1 0	Res beta1 0	Res beta1 0	Res beta1 0	Res beta1 0	Res beta1 0	Res beta1 0	Res beta1 0
	Res beta1 beta2	MLTries 10000	MLTries 10000	MLTries 10000	MLTries 10000	MLTries 10000	MLTries 10000	MLTries 10000	MLTries 10000
	MLTries 10000	ScaleTrees 1000	ScaleTrees 1000	ScaleTrees 1000	ScaleTrees 1000	ScaleTrees 1000	ScaleTrees 1000	ScaleTrees 1000	ScaleTrees 1000
	ScaleTrees 1000	run	run	run	run	run	run	run	run
	run
Dependent model arguments	Res q12 q13	Res q24 q13	Res q24 q13	Res q24 q13	Res q24 q13	Res q24 q13	Res q24 q13	Res q24 q13	Res q24 q13
	Res q21 q31	Res q31 q42 0	Res q31 q42 0	Res q31 q42 0	Res q31 q42 0	Res q31 q42 0	Res q31 q42 0	Res q31 q42 0	Res q31 q42 0
	Res q24 q34	MLTries 10000	MLTries 10000	MLTries 10000	MLTries 10000	MLTries 10000	MLTries 10000	MLTries 10000	MLTries 10000
	Res q42 q43	ScaleTrees 1000	ScaleTrees 1000	ScaleTrees 1000	ScaleTrees 1000	ScaleTrees 1000	ScaleTrees 1000	ScaleTrees 1000	ScaleTrees 1000
	MLTries 10000	run	run	run	run	run	run	run	run
	ScaleTrees 1000
	run

## Sheet: Cleavage Div vs Conv
Trait 1	Site 1	Site 1	Site 1	Site 1	Site 1
Trait 2	Site 2	Site 2	Site 2	Site 2	Site 2
Method	Discrete-Dependent	Discrete-Dependent	Discrete-Dependent	Discrete-Dependent	Discrete-Dependent
evolutionary model	unconstrained	Site 1 Divergent	Site 2 Divergent	ENaC node - no site 1	ENaC node - no site 2
Marginal likelihood	-35.2002	-38.6215	-38.6209	-35.3916	-35.3689
logBF vs unconstrained	0	6.84273	6.84151	0.38279	0.337484
logBF vs divergent				6.45994	6.50403
Model parameters MCMC average
q12 (trait1=0, trait2 = f)	4.39715	3.51205	3.4986	4.17026	4.15245
q13 (trait2=0, trait1 = f)	4.39715	3.51205	3.4986	4.17026	4.15245
q21 (trait1=0, trait2 = r)	62.4284	60.6665	60.2963	60.9292	60.705
q24 (trait2=1, trait1 = f)	0.00169439	0.000794607	0.00080238	0.00177703	0.0017915
q31 (trait2=0, trait1 = r)	62.4284	60.6665	60.2963	60.9292	60.705
q34 (trait1=1, trait2 = f)	0.00169439	0.000794607	0.00080238	0.00177703	0.0017915
q42 (trait2=1, trait1 = r)	0.000718801	0.0012974	0.00127303	0.000657152	0.000642259
q43 (trait1=1, trait2 = r)	0.000718801	0.0012974	0.00127303	0.000657152	0.000642259
Root - P(0,0)	0.296931	0.0192554	0.0187292	0.325214	0.325481
Root - P(0,1)	0.296917	0.0192764	0.0187518	0.325197	0.325462
Root - P(1,0)	0.296917	0.0192764	0.0187518	0.325197	0.325462
Root - P(1,1)	0.109236	0.942192	0.943767	0.0243916	0.0235953
ENaC - P(0,0)	0.280944	0	0	0.500007	0.500009
ENaC - P(0,1)	0.280933	0	0.00199527	0.499993	0
ENaC - P(1,0)	0.280933	0.00214447	0	0	0.499991
ENaC - P(1,1)	0.15719	0.997856	0.998005	0	0
bg - P(0,0)	0.24567	0	0	0.255359	0.257053
bg - P(0,1)	0.245683	0	0.170753	0.255373	0.257067
bg - P(1,0)	0.245683	0.174874	0	0.255373	0.257067
bg - P(1,1)	0.262964	0.825126	0.829247	0.233895	0.228812
alpha - P(0,0)	0.308368	0	0	0.317253	0.317731
alpha - P(0,1)	0.308353	0	0.0730416	0.317238	0.317714
alpha - P(1,0)	0.308353	0.0745364	0	0.317238	0.317714
alpha - P(1,1)	0.0749267	0.925464	0.926958	0.0482713	0.0468424
ad - P(0,0)	0.300393	0	0	0.31057	0.311261
ad - P(0,1)	0.300379	0	0.34529	0.310557	0.311245
ad - P(1,0)	0.300379	0.345595	0	0.310557	0.311245
ad - P(1,1)	0.0988488	0.654405	0.65471	0.0683167	0.0662493
Model arguments	Res q12 q13	Res q12 q13	Res q12 q13	Res q12 q13	Res q12 q13
	Res q21 q31	Res q21 q31	Res q21 q31	Res q21 q31	Res q21 q31
	Res q24 q34	Res q24 q34	Res q24 q34	Res q24 q34	Res q24 q34
	Res q42 q43	Res q42 q43	Res q42 q43	Res q42 q43	Res q42 q43
	Prior q34 exp 0.001	Prior q34 exp 0.001	Prior q34 exp 0.001	Prior q34 exp 0.001	Prior q34 exp 0.001
	Prior q43 exp 0.001	Prior q43 exp 0.001	Prior q43 exp 0.001	Prior q43 exp 0.001	Prior q43 exp 0.001
	Stones 100 10000	Stones 100 10000	Stones 100 10000	Stones 100 10000	Stones 100 10000
	ScaleTrees 1000	ScaleTrees 1000	ScaleTrees 1000	ScaleTrees 1000	ScaleTrees 1000
	AddTag TENaC Cow_alpha Cow_beta	AddTag TENaC Cow_alpha Cow_beta	AddTag TENaC Cow_alpha Cow_beta	AddTag TENaC Cow_alpha Cow_beta	AddTag TENaC Cow_alpha Cow_beta
	ADDMRCA ENaC TENaC	Fossil ENaC TENaC 15	Fossil ENaC TENaC 14	Fossil ENaC TENaC 10	Fossil ENaC TENaC 11
	AddTag Tbg Cow_beta Cow_gamma	AddTag Tbg Cow_beta Cow_gamma	AddTag Tbg Cow_beta Cow_gamma	AddTag Tbg Cow_beta Cow_gamma	AddTag Tbg Cow_beta Cow_gamma
	AddMRCA bg Tbg	Fossil bg Tbg 15	Fossil bg Tbg 14	AddMRCA bg Tbg	AddMRCA bg Tbg
	AddTag Talpha Cow_alpha SLamprey_alpha	AddTag Talpha Cow_alpha SLamprey_alpha	AddTag Talpha Cow_alpha SLamprey_alpha	AddTag Talpha Cow_alpha SLamprey_alpha	AddTag Talpha Cow_alpha SLamprey_alpha
	AddMRCA alpha Talpha	Fossil alpha Talpha 15	Fossil alpha Talpha 14	AddMRCA alpha Talpha	AddMRCA alpha Talpha
	AddTag Tad Cow_alpha Cow_delta	AddTag Tad Cow_alpha Cow_delta	AddTag Tad Cow_alpha Cow_delta	AddTag Tad Cow_alpha Cow_delta	AddTag Tad Cow_alpha Cow_delta
	AddMRCA ad Tad	Fossil ad Tad 15	Fossil ad Tad 14	AddMRCA ad Tad	AddMRCA ad Tad
	run	run	run	run	run

## Sheet: PY motif Div vs Conv
Trait 1	Terrestrial	Terrestrial	Terrestrial	Terrestrial	Terrestrial	Terrestrial
Trait 2	PY	PY	PY	PY	PY	PY
Method	Discrete-independent	Discrete-independent	Discrete-independent	Discrete-independent	Discrete-independent	Discrete-independent
evolutionary model	unconstrained	Divergent	ENaC-No PY	bg-No PY	alpha-No PY	ad-No PY
Marginal likelihood	-29.0859	-29.183	-31.531	-33.5786	-31.8672	-31.8842
logBF vs unconstrained	0	0.19417	4.89022	8.98538	5.56262	5.59667
logBF vs divergent	-0.19417	0	4.69605	8.79121	5.36845	5.4025
Model parameters MCMC average
alpha1	0.000481101	0.000478073	0.000471087	0.00047058	0.000461481	0.00046079
beta1	0	0	0	0	0	0
alpha2	0.000352563	0.000298736	0.000665437	0.000855582	0.000693313	0.000700206
beta2	0.000344569	0.000350409	0.000194792	0.000219793	0.000167362	0.000179463
Root - P(0,0)	0.496396	0.447962	0.997468	0.984284	0.978405	0.961969
Root - P(0,1)	0.503604	0.552038	0.0025324	0.0157157	0.0215951	0.0380306
Root - P(1,0)	0	0	0	0	0	0
Root - P(1,1)	0	0	0	0	0	0
ENaC - P(0,0)	0.019117	0	1	0.910122	0.778626	0.664764
ENaC - P(0,1)	0.980883	1	0	0.0898781	0.221374	0.335236
ENaC - P(1,0)	0	0	0	0	0	0
ENaC - P(1,1)	0	0	0	0	0	0
bg - P(0,0)	0.00692248	0	0.0182744	1	0.019444	0.0199399
bg - P(0,1)	0.993078	1	0.981726	0	0.980556	0.98006
bg - P(1,0)	0	0	0	0	0	0
bg - P(1,1)	0	0	0	0	0	0
alpha - P(0,0)	0.084735	0	0.277774	0.337505	1	0.975349
alpha - P(0,1)	0.915265	1	0.722226	0.662495	0	0.0246505
alpha - P(1,0)	0	0	0	0	0	0
alpha - P(1,1)	0	0	0	0	0	0
ad - P(0,0)	0.241479	0	0.519059	0.556155	0.577025	1
ad - P(0,1)	0.758521	1	0.480941	0.443845	0.422975	0
ad - P(1,0)	0	0	0	0	0	0
ad - P(1,1)	0	0	0	0	0	0
Model arguments	Res beta1 0	Res beta1 0	Res beta1 0	Res beta1 0	Res beta1 0	Res beta1 0
	PriorAll exp 0.001	PriorAll exp 0.001	PriorAll exp 0.001	PriorAll exp 0.001	PriorAll exp 0.001	PriorAll exp 0.001
	ScaleTrees 1000	ScaleTrees 1000	ScaleTrees 1000	ScaleTrees 1000	ScaleTrees 1000	ScaleTrees 1000
	Stones 100 10000	Stones 100 10000	Stones 100 10000	Stones 100 10000	Stones 100 10000	Stones 100 10000
	AddTag TENaC Cow_alpha Cow_beta	AddTag TENaC Cow_alpha Cow_beta	AddTag TENaC Cow_alpha Cow_beta	AddTag TENaC Cow_alpha Cow_beta	AddTag TENaC Cow_alpha Cow_beta	AddTag TENaC Cow_alpha Cow_beta
	ADDMRCA ENaC TENaC	Fossil ENaC TENaC 14	Fossil ENaC TENaC 11	ADDMRCA ENaC TENaC	ADDMRCA ENaC TENaC	ADDMRCA ENaC TENaC
	AddTag Tbg Cow_beta Cow_gamma	AddTag Tbg Cow_beta Cow_gamma	AddTag Tbg Cow_beta Cow_gamma	AddTag Tbg Cow_beta Cow_gamma	AddTag Tbg Cow_beta Cow_gamma	AddTag Tbg Cow_beta Cow_gamma
	AddMRCA bg Tbg	Fossil bg Tbg 14	AddMRCA bg Tbg	Fossil bg Tbg 11	AddMRCA bg Tbg	AddMRCA bg Tbg
	AddTag Talpha Cow_alpha SLamprey_alpha	AddTag Talpha Cow_alpha SLamprey_alpha	AddTag Talpha Cow_alpha SLamprey_alpha	AddTag Talpha Cow_alpha SLamprey_alpha	AddTag Talpha Cow_alpha SLamprey_alpha	AddTag Talpha Cow_alpha SLamprey_alpha
	AddMRCA alpha Talpha	Fossil alpha Talpha 14	AddMRCA alpha Talpha	AddMRCA alpha Talpha	Fossil alpha Talpha 11	AddMRCA alpha Talpha
	AddTag Tad Cow_alpha Cow_delta	AddTag Tad Cow_alpha Cow_delta	AddTag Tad Cow_alpha Cow_delta	AddTag Tad Cow_alpha Cow_delta	AddTag Tad Cow_alpha Cow_delta	AddTag Tad Cow_alpha Cow_delta
	AddMRCA ad Tad	Fossil ad Tad 14	AddMRCA ad Tad	AddMRCA ad Tad	AddMRCA ad Tad	Fossil ad Tad 11
	run	run	run	run	run	run
