# Supplementary material for: Activation by cleavage of the epithelial Na+ channel α and γ subunits independently coevolved with the vertebrate terrestrial migration
Source: eLife journal article supplement (doi:10.7554/elife.75796), 2022-01-05

Figure 4A-1, Ropefish, RT-PCR data for ENaC  $\alpha$ ,  $\beta$ , and  $\gamma$  subunits

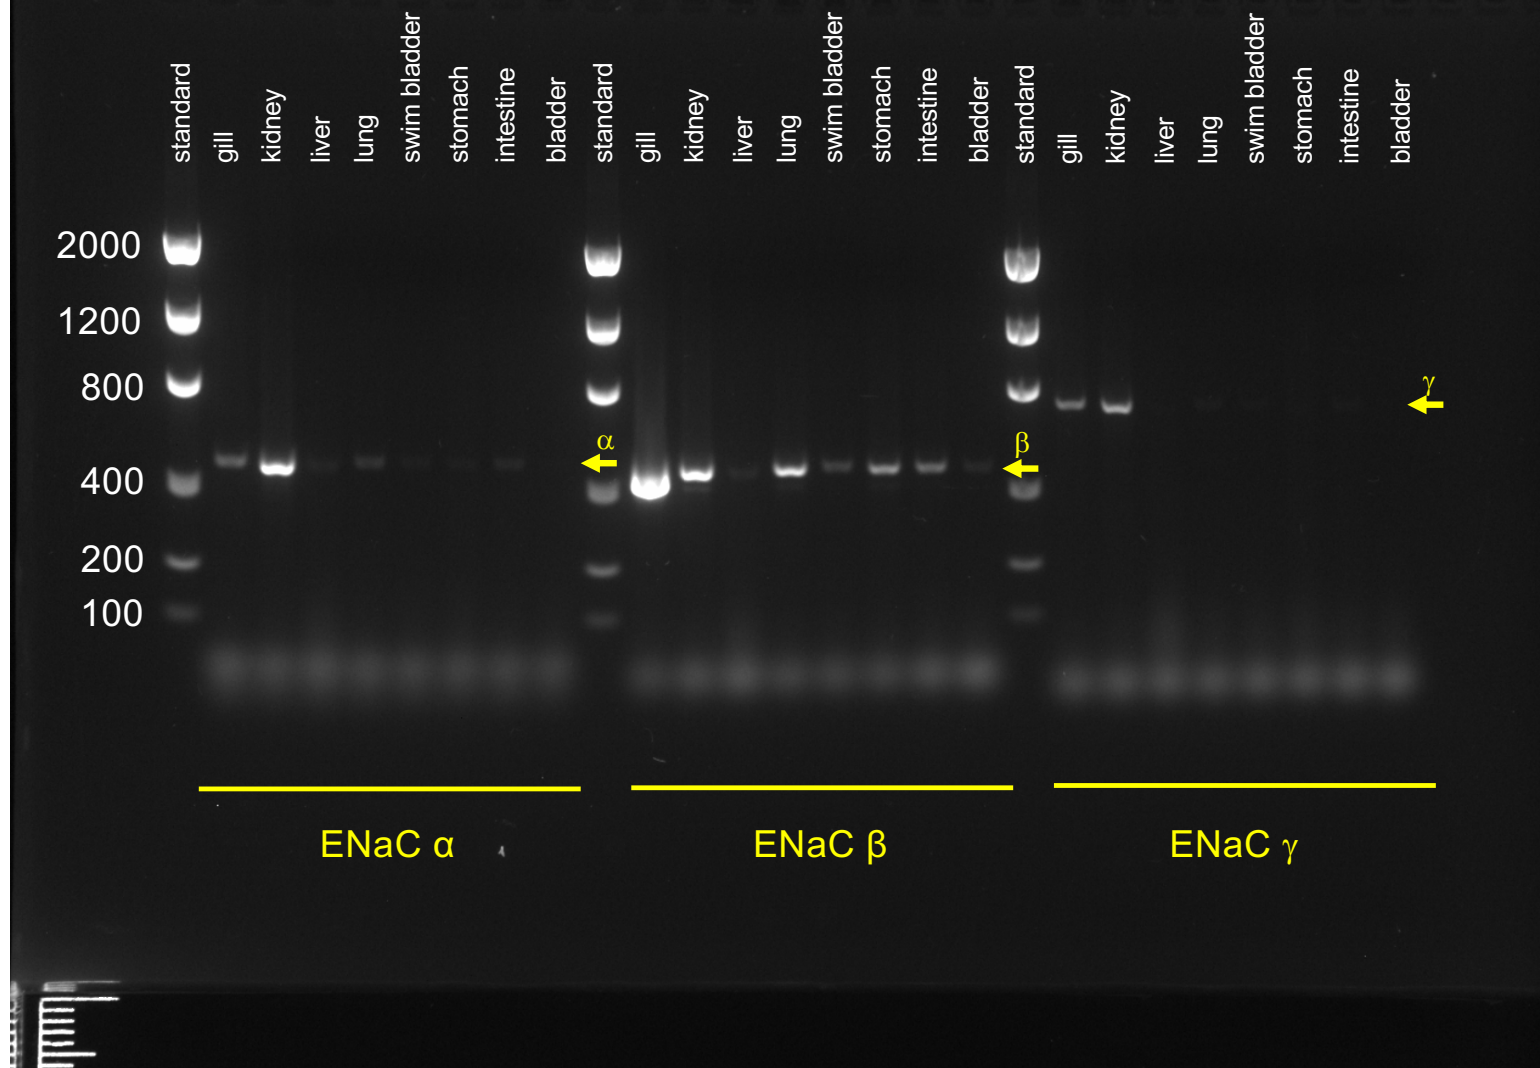

Figure 4A-2, Ropefish, RT-PCR data for GAPDH

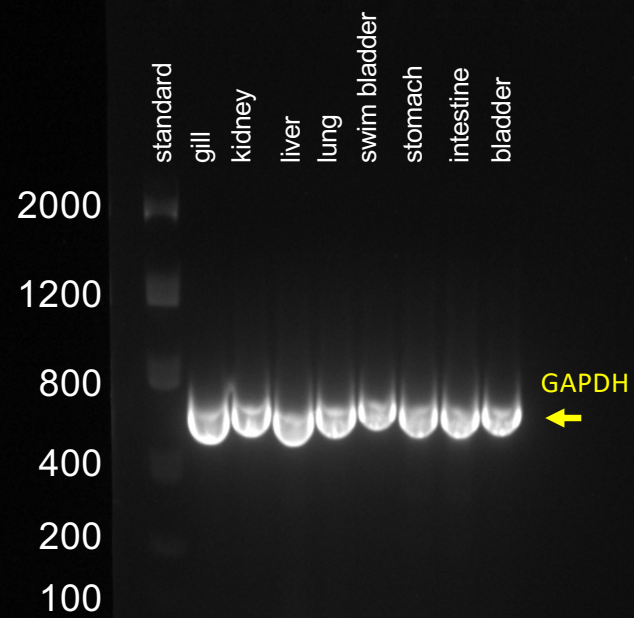

Figure 4B-1, *Xenopus laevis*, RT-PCR data for ENaC  $\alpha$  and  $\beta$  subunits

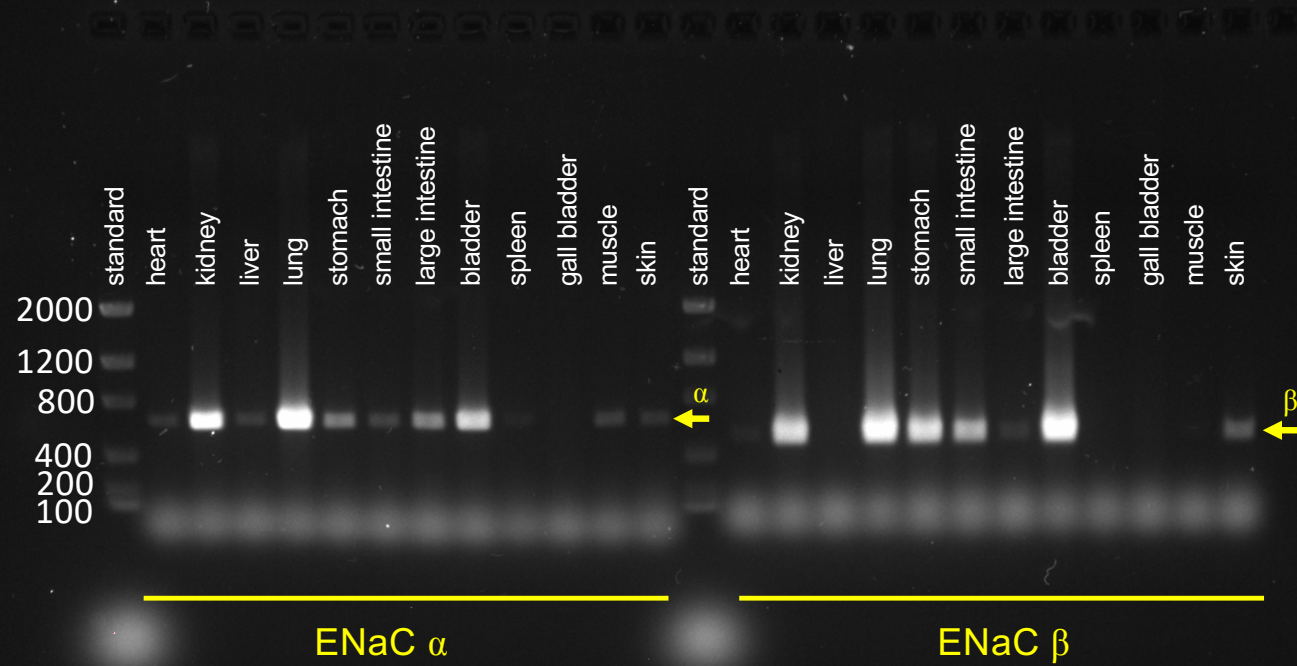

Figure 4B-2, *Xenopus laevis*, RT-PCR data for ENaC  $\gamma$  and  $\delta$  subunits

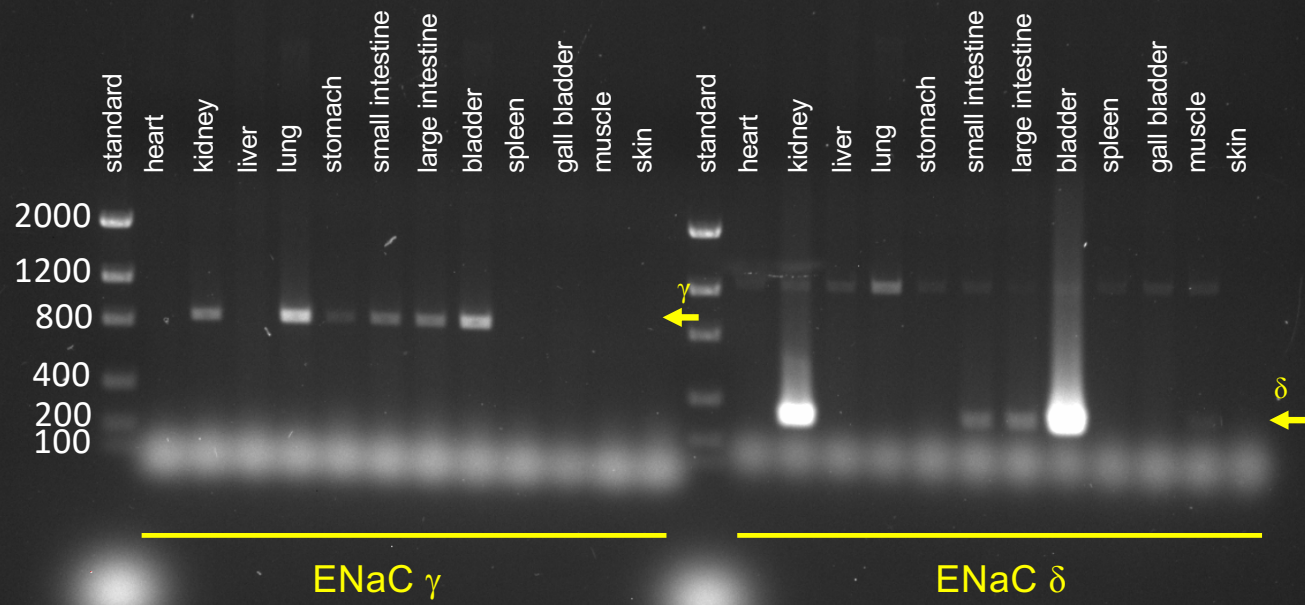



Figure 4B-3, *Xenopus laevis*, RT-PCR data for  $\beta$ -actin

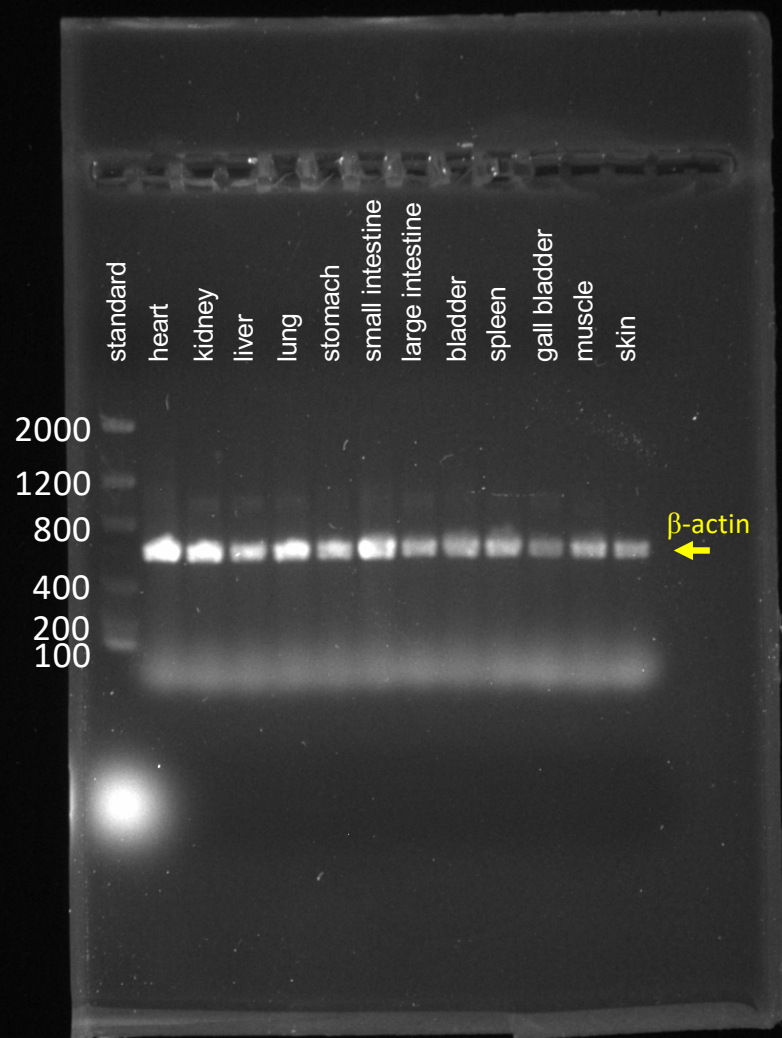

Supplement: supp [file elife-75796-supp-v1.zip]
