# Supplementary material for: Activation by cleavage of the epithelial Na+ channel α and γ subunits independently coevolved with the vertebrate terrestrial migration
Source: eLife journal article supplement (doi:10.7554/elife.75796), 2022-01-05
Supplement: supp [file Figure 3 source data.xlsx]

## Sheet: Figure 3 blot data
	Blot 1
	Anti-GAPDH	Anti-HA full length	Anti-HA cleaved		cleavage (%) at total	cleavage (%) at surface	GAPDH norm. total	mg norm. total	surface (%)	GAPDH norm. surface	mg norm. surface
mg whole cell	not available	1.93074e+07	1.23798e+07	mg	39.0687	13.3179			2.34131
Ag whole cell	not available	6.92005e+07	4.25721e+07	Ag	38.0881	65.0644			0.0571403
Ag2A whole cell	not available	2.3707e+07	1.10995e+07	Ag2A	31.8893	21.0214			0.4272
mg surface	not available	643092	98804.7
Ag surface	not available	22312.4	41554.7
Ag2A surface	not available	117436	31257.4
	Blot 2
	Anti-GAPDH	Anti-HA full length	Anti-HA cleaved		cleavage (%) at total	cleavage (%) at surface	norm. total	mg norm. total	surface (%)	GAPDH norm. surface	mg norm. surface
mg whole cell	5.4652e+06	9.82941e+07	10122580	mg	9.33674	54.0091	19.8376	0.393628	2.00879	0.398497	0.95861
Ag whole cell	3.39064e+06	4.24341e+07	1.22898e+07	Ag	22.4579	27.6321	16.1397	0.320252	0.705871	0.113925	0.274055
Ag2A whole cell	2.95472e+06	2.56229e+07	1.30757e+06	Ag2A	4.85535	1.64879	9.11439	0.180852	3.13354	0.285603	0.687036
mg surface		1.00162e+06	1.17625e+06
Ag surface		279543	106737
Ag2a surface		829964	13913.8
	Blot 3
	Anti-GAPDH	Anti-HA full length	Anti-HA cleaved		cleavage (%) at total	cleavage (%) at surface	norm. total	mg norm. total	surface (%)	GAPDH norm. surface	mg norm. surface
mg whole cell	4432468	9.16022e+07	8.78246e+06	mg	8.74881	57.3289	22.6476	0.449385	6.69344	1.5159	3.6466
Ag whole cell	7094212	1.13918e+08	4.83962e+07	Ag	29.8163	59.4439	22.8798	0.453993	3.2044	0.733161	1.76367
Ag2A whole cell	9493066	7.62743e+07	3.14152e+07	Ag2A	29.172	48.0369	11.344	0.225094	2.0992	0.238134	0.572846
mg surface		2.86715e+06	3852033
Ag surface		2.1094e+06	3.0918e+06
Ag2A surface		1.17469e+06	1.08593e+06
	Blot 4-1
	Anti-GAPDH	Anti-HA full length	Anti-HA cleaved		cleavage (%) at total	cleavage (%) at surface	norm. total	mg norm. total	surface (%)	GAPDH norm. surface	mg norm. surface
mg whole cell	6843187	4.03718e+08	5.12603e+07	mg	11.2665	21.239	66.4863	1.31925	0.100434	0.0667749	0.160631
Ag whole cell	6646305	201704705	9.57124e+07	Ag	32.1812	49.4417	44.7492	0.887937	0.191671	0.0857713	0.206328
Ag2A whole cell	5733850	3.04071e+08	2.02981e+07	Ag2A	6.25772	15.4337	56.571	1.12251	0.0772381	0.0436943	0.105109
mg surface		359901	97052.4
Ag surface		288214	281849
Ag2A surface		211870	38667.1
	Blot 4-2
	Anti-GAPDH	Anti-HA full length	Anti-HA cleaved		cleavage (%) at total	cleavage (%) at surface	norm. total	mg norm. total	surface (%)	GAPDH norm. surface	mg norm. surface
mg whole cell	3590758	1.84149e+08	7.08386e+06	mg	3.70431	14.0358	53.257	1.05675	0.308572	0.164336	0.395321
Ag whole cell	6313303	1.14873e+08	1.05779e+08	Ag	47.9394	66.2592	34.9503	0.693502	0.309413	0.108141	0.26014
Ag2A whole cell	6409365	1.73038e+08	2.27872e+07	Ag2A	11.6365	21.7313	30.5529	0.606247	0.427074	0.130484	0.313886
mg surface		507267	82824.1
Ag surface		230357	452369
Ag2a surface		654575	181742
	Blot 5-1
	Anti-GAPDH	Anti-HA full length	Anti-HA cleaved		cleavage (%) at total	cleavage (%) at surface	norm. total	mg norm. total	surface (%)	GAPDH norm. surface	mg norm. surface
mg whole cell	6478290	586255100	26672000	mg	4.35158	42.3259	94.6125	1.87735	0.25503	0.24129	0.580438
Ag whole cell	7286622	474370800	81831050	Ag	14.7125	29.5671	76.3319	1.51462	0.122681	0.0936448	0.225268
Ag2A whole cell	8360520	430418400	21527200	Ag2A	4.76323	10.847	54.0571	1.07263	0.076026	0.0410974	0.0988625
mg surface		901531	661616
Ag surface		480602	201752
Ag2A surface		306326	37270
	Blot 5-2
	Anti-GAPDH	Anti-HA full length	Anti-HA cleaved		cleavage (%) at total	cleavage (%) at surface	norm. total	mg norm. total	surface (%)	GAPDH norm. surface	mg norm. surface
mg whole cell	11810778	484470150	5.33938e+07	mg	9.927	29.4771	45.5401	0.90363	0.235879	0.10742	0.258405
Ag whole cell	11718714	388690350	89785100	Ag	18.7648	46.1165	40.83	0.810171	0.410828	0.167741	0.403512
Ag2A whole cell	13142934	431968800	73745300	Ag2A	14.5824	26.8875	38.478	0.763501	0.275054	0.105835	0.254593
mg surface		894731	373979
Ag surface		1059193	906517
Ag2A surface		1016984	374001

## Sheet: Figure 3 current data
	baseline currents (nA)					amiloride currents (nA)					amiloride-sensitive currents					log inward currents
	maDbT	mg	Ag	Ag2A		maDbT	mg	Ag	Ag2A		maDbT	mg	Ag	Ag2A		maDbT	mg	Ag	Ag2A
batch 1
1	-537.109	-12957.8	-781.25			-384.521	-708.008	-76.2939			-152.588	-12249.8	-704.956			2.18352	4.08813	2.84816
2	-158.691	-7330.32	-756.836			-109.863	-442.505	-381.47			-48.8281	-6887.82	-375.366			1.68867	3.83808	2.57446
3	-82.3975		-418.091			-54.9316		-155.64			-27.4658		-262.451			1.43879		2.41905
4	-109.863		-570.679			-88.501		-296.021			-21.3623		-274.658			1.32965		2.43879
5	-97.6562		-598.145			-54.9316		-164.795			-42.7246		-433.35			1.63068		2.63684
6	-88.501		-430.298			-54.9316		-250.244			-33.5693		-180.054			1.52594		2.2554
7			-619.507					-283.813					-335.693					2.52594
8			-866.699					-241.089					-625.61					2.7963
9			-616.455					-177.002					-439.453					2.64291
batch 2	-73.2422	-9326.17	-671.387	-173.95		-30.5176	-88.501	-177.002	-134.277		-42.7246	-9237.67	-494.385	-39.6729		1.63068	3.96556	2.69407	1.59849
1	-262.451	-5755.61	-1580.81	-231.934		-158.691	-67.1387	-119.019	-201.416		-103.76	-5688.48	-1461.79	-30.5176		2.01603	3.755	3.16489	1.48455
2	-54.9316	-10937.5	-769.043	-112.915		-33.5693	-262.451	-85.4492	-79.3457		-21.3623	-10675	-683.594	-33.5693		1.32965	4.02837	2.8348	1.52594
3	-57.9834	-15429.7	-1245.12	-146.484		-39.6728	-308.228	-158.691	-54.9316		-18.3105	-15121.5	-1086.43	-91.5527		1.2627	4.17959	3.036	1.96167
4	-39.6728	-20086.7	-738.525	-225.83		-18.3105	-1019.29	-192.261	-122.07		-21.3623	-19067.4	-546.265	-103.76		1.32965	4.28029	2.7374	2.01603
5	-51.8799	-5426.02	-582.886	-210.571		-21.3623	-128.174	-146.484	-134.277		-30.5176	-5297.85	-436.401	-76.2939		1.48455	3.7241	2.63989	1.88249
6		-10159.3					-143.433					-10015.9					4.00069
7		-5505.37					-164.795					-5340.58					3.72759
8		-15216.1					-219.727					-14996.3					4.17599
9		-11901.9					-195.312					-11706.5					4.06843
10		-15844.7					-262.451					-15582.3					4.19263
11		-14712.5					-253.296					-14459.2					4.16015
12		-10302.7					-350.952					-9951.78					3.9979
batch 3
1		-15924.1	-238.037	-85.4492			-143.433	-70.1904	-67.1387			-15780.6	-167.847	-18.3105			4.19812	2.22491	1.2627
2		-14727.8		-128.174			-4040.53		-100.708			-10687.3		-27.4658			4.02887		1.43879
batch 4	-122.07	-6036.38	-228.882	-296.02		-24.4141	-51.8799	-15.2588	-24.4141		-97.6562	-5984.5	-213.623	-271.606		1.9897	3.77703	2.32965	2.43394
1	-94.6045	-14785.8	-238.037	-354.004		-42.7246	-143.433	-18.3105	-195.312		-51.8799	-14642.3	-219.727	-158.691		1.715	4.16561	2.34188	2.20055
2	-61.0352		-1666.26	-250.244		-24.4141		-335.693	-24.4141		-36.6211		-1330.57	-225.83		1.56373		3.12404	2.35378
3	-155.64		-2206.42	-186.157		-30.5176		-1483.15	-21.3623		-125.122		-723.266	-164.795		2.09733		2.8593	2.21694
4	-88.501			-97.6562		-24.4141		-1483.15	-76.2939		-64.0869			-21.3623		1.80677			1.32965
5	-396.728					-48.8281					-347.9					2.54145
6	-268.555					-21.3623					-247.192					2.39304
7	-354.004					-42.7246					-311.279					2.49315
8	-256.348					-30.5176					-225.83					2.35378
