# Supplementary figures and images for: Activation by cleavage of the epithelial Na+ channel α and γ subunits independently coevolved with the vertebrate terrestrial migration
Source: eLife journal article supplement (doi:10.7554/elife.75796), 2022-01-05

Figure 3. Blot 1

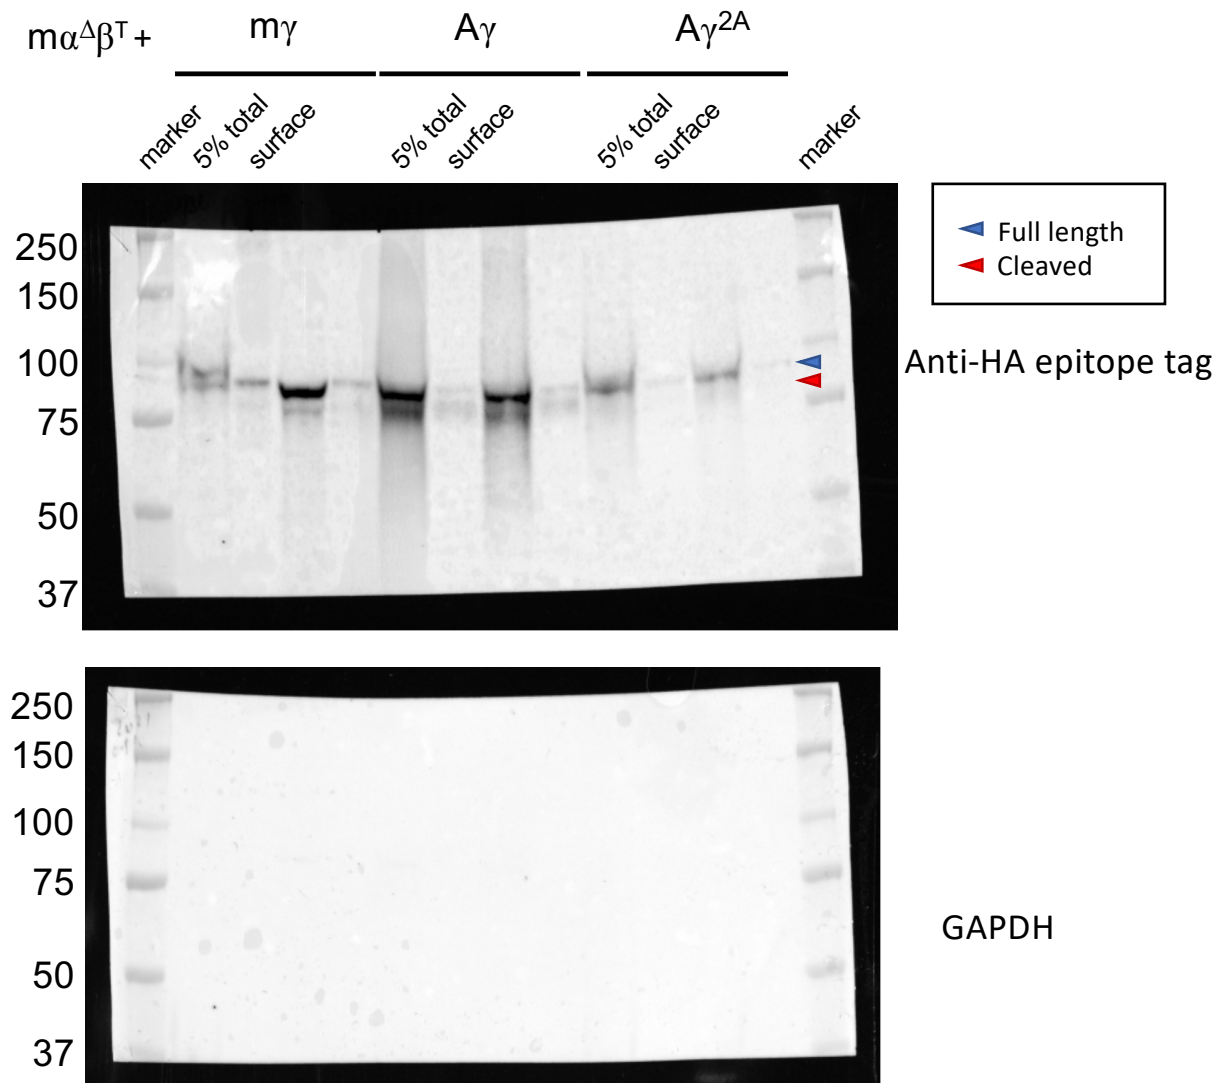

Figure 3. Blot 2

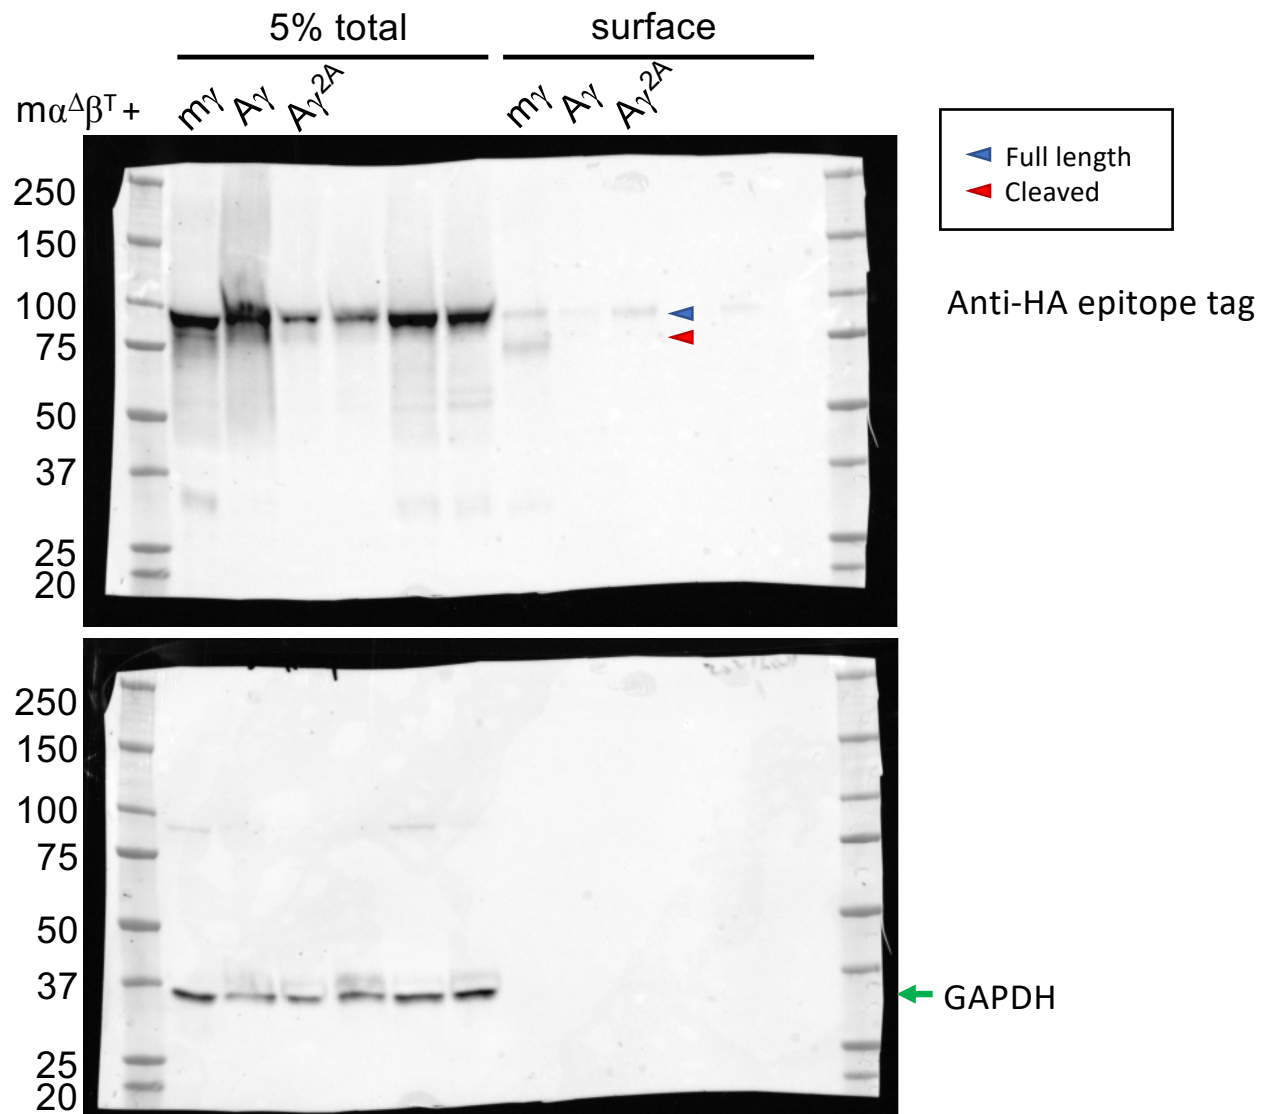

Figure 3. Blot 3

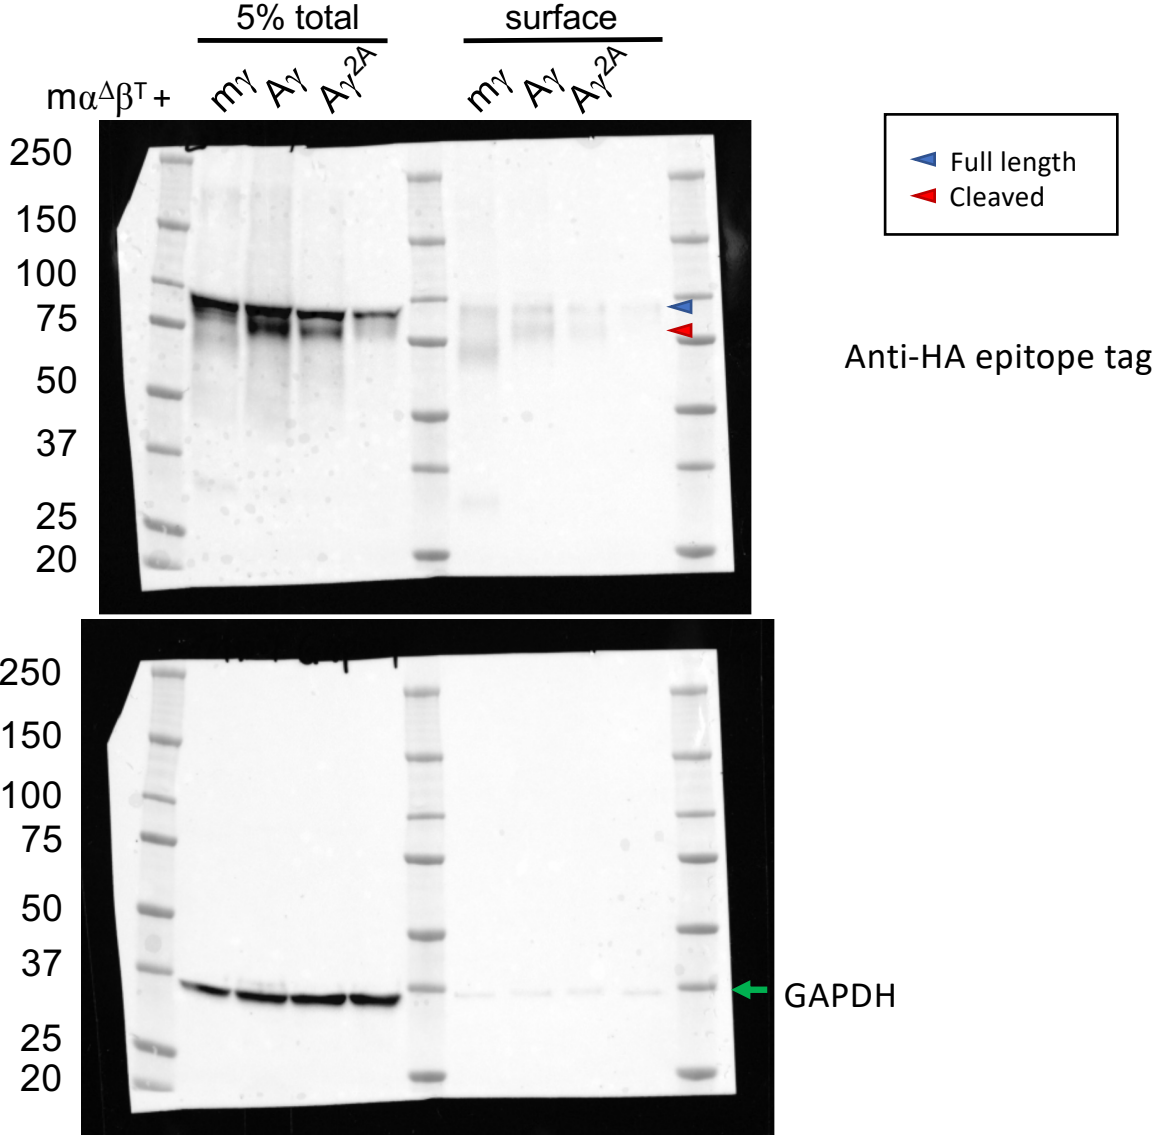

Figure 3. Blot 4

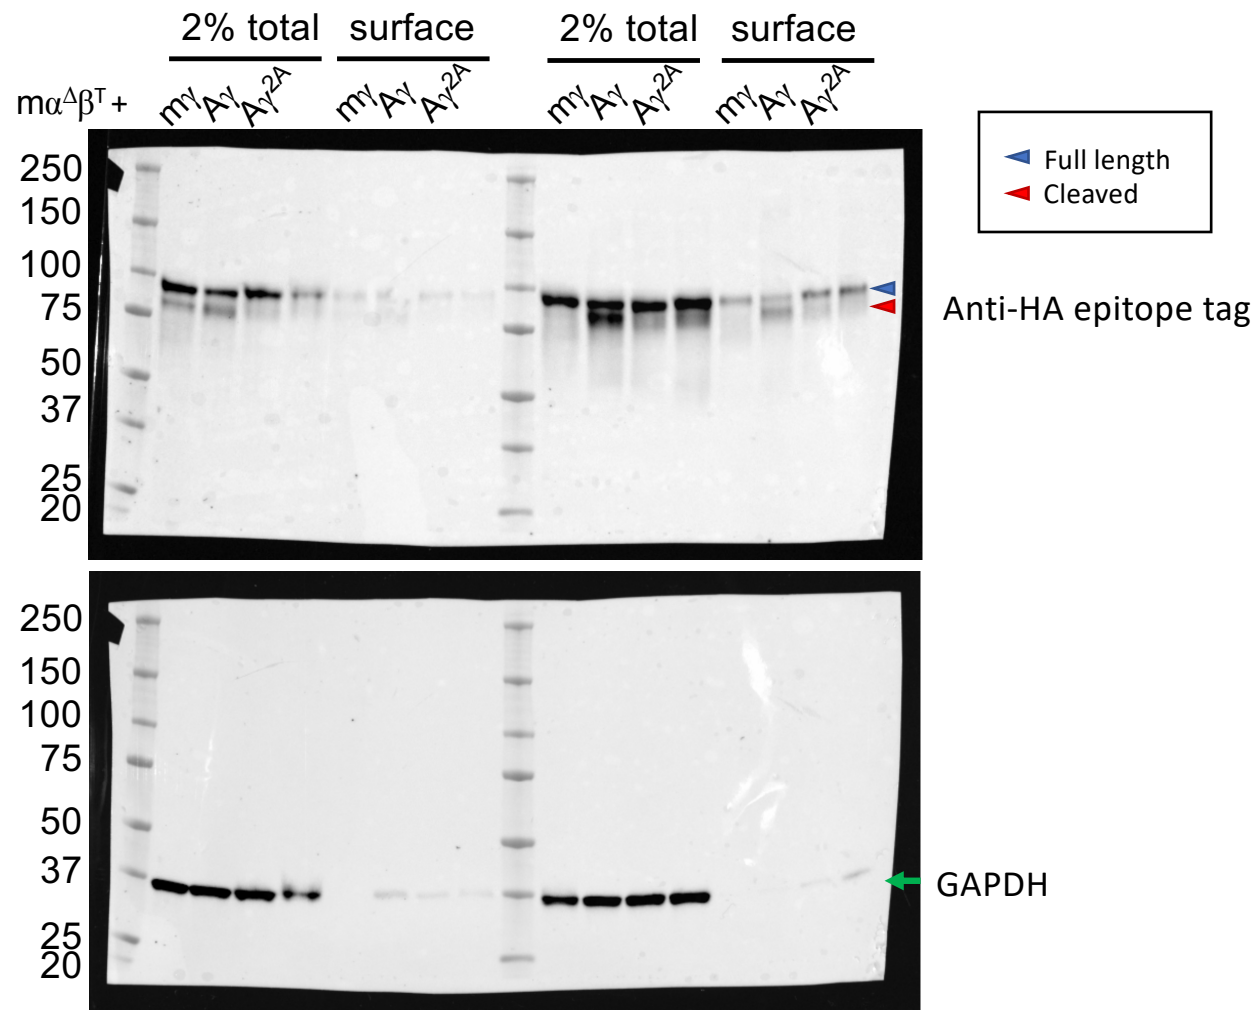

Figure 3. Blot 5

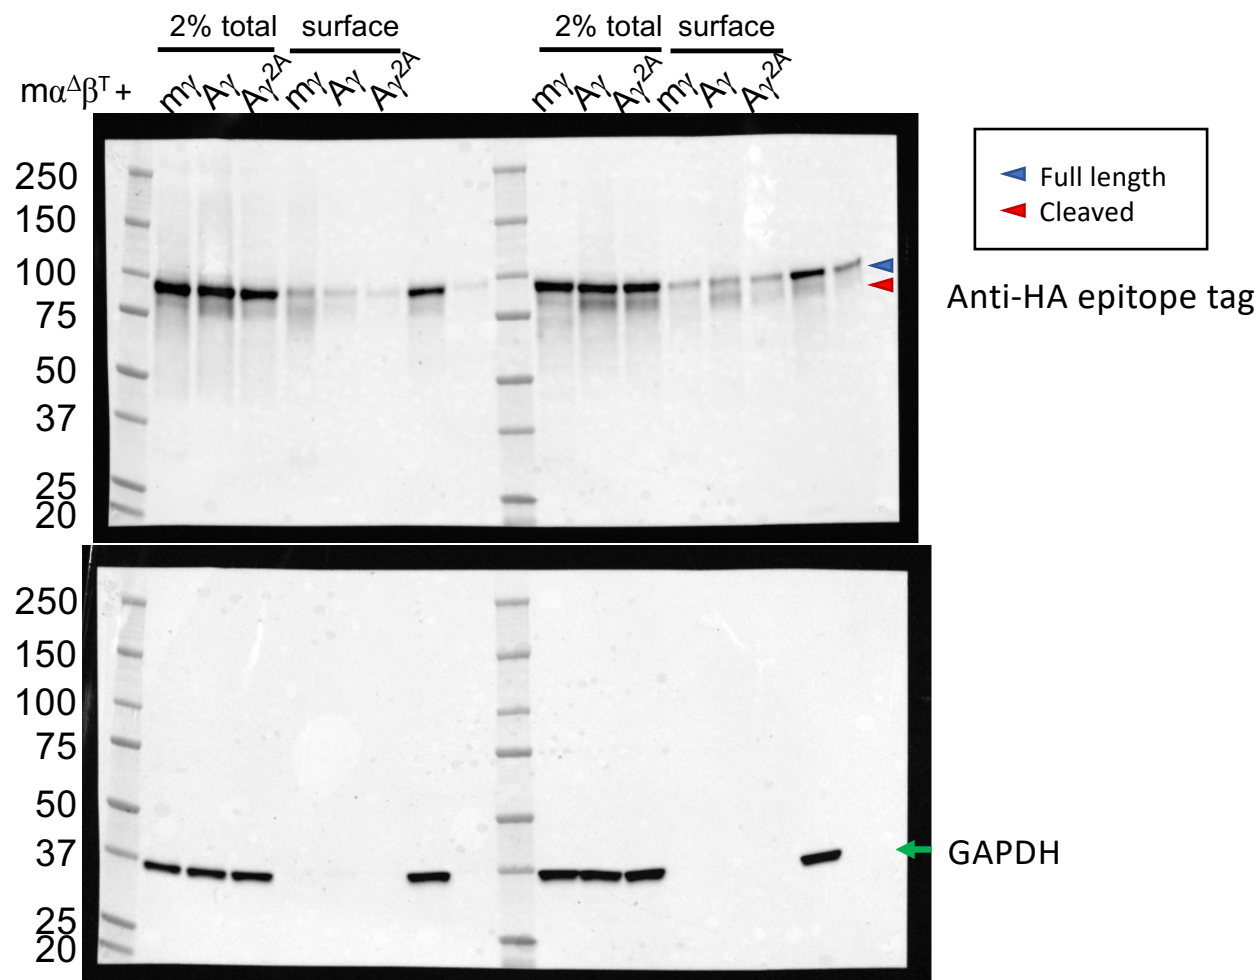

Supplement: supp [file elife-75796-supp-v1.zip]
